# Supplementary material for: Aflatoxin B1 Exposure in Sheep: Insights into Hepatotoxicity Based on Oxidative Stress, Inflammatory Injury, Apoptosis, and Gut Microbiota Analysis
Source: MDPI journal article supplement (doi:10.3390/toxins14120840), 2022-12-01
Supplement: s1 [file s1]

# Supplementary Materials: Aflatoxin B<sub>1</sub> Exposure in Sheep: Insights into Hepatotoxicity Based on Oxidative Stress, Inflammatory Injury, Apoptosis, and Gut Microbiota Analysis

Yuzhen Sui, Ying Lu, Shoujun Zuo, Haidong Wang, Xiaokun Bian, Guizhen Chen, Shucheng Huang, Hongyu Dai, Fang Liu and Haiju Dong

**Table S1.** Primer sequences for qPCR analysis.

| Gene      | Gene ID        | Sequence (5'-3')                                            | Fragment length (bp) |
|-----------|----------------|-------------------------------------------------------------|----------------------|
| β-actin   | NM_001009784.3 | F:GCTCTCTTCCAGCCTTCCTT<br>R:AGGTCTTTGCGGATGTCG              | 101                  |
| TNF-α     | XM_012100437.3 | F:CCCAACTCCCTCTGTTTATGTT<br>R:GGACACCTTGACCTCCTGAATA        | 102                  |
| IL-1β     | NM_001009465.2 | F:TCTCCCTAAAGAAGCCATAC<br>R:AGCGTCTCAGCACGAATA              | 151                  |
| IL-6      | NM_001009392.1 | F:ACGAGTGGGTAAAGAACGCAAAGG<br>R:GCCGAGCTACTTCATCCGAATAG     | 99                   |
| IL-10     | NM_001009327.1 | F:GGTGATGCCACAGGCTGAGAAC<br>R:GCTCCACCGCCTTGCTCTTG          | 143                  |
| SOD-1     | NM_001145185.2 | F:TTCTGCGGCGTTTCCTTGTCTG<br>R:CGAAGCGGATGGTGCCTTGC          | 138                  |
| SOD-2     | NM_001280703.1 | F:GGCAGCGTCCACCATGTTGTC<br>R:GCGTTGATGTGCGGCTCCAG           | 144                  |
| Caspase-3 | XM_027962551.1 | F:CCCCTGTCAGCAACATTAATCC<br>R:CCGGAGTCCACTGATTTGCT          | 150                  |
| Bax       | XM_027978594.1 | F:CGCATTGGAGATGAATTGGACAGTAAC<br>R:CAGTTGAAGTTGCCGTCGGAAAAC | 128                  |
| Bcl-2     | XM_027960877.1 | F:TGTGGATGACCGAGTACCTGAACC<br>R:AGAGACAGCCAGGAGAAATCAAACAG  | 127                  |

Note: F, Forward primer; R, Reverse primer. β-actin, reference gene.

**Table S2.** Effects of AFB<sub>1</sub> exposure on body temperature, breathing, and heart rate of sheep.

| Factors          | Item                   | Pro-test                 | Post-test                | D-value     |
|------------------|------------------------|--------------------------|--------------------------|-------------|
| Body temperature | Control group          | 39.25±0.39 <sup>a</sup>  | 39.20±0.55 <sup>a</sup>  | -0.05±0.29  |
|                  | AFB <sub>1</sub> group | 38.88±0.50 <sup>a</sup>  | 39.53±0.78 <sup>a</sup>  | 0.65±0.23   |
|                  | <i>P</i> -value        | 0.280                    | 0.519                    | 0.043       |
| Breathing        | Control group          | 17.75±2.99 <sup>a</sup>  | 18.25±2.98 <sup>a</sup>  | 0.5±2.52    |
|                  | AFB <sub>1</sub> group | 13.25±4.65 <sup>a</sup>  | 12.75±4.03 <sup>a</sup>  | -0.5±1.0    |
|                  | <i>P</i> -value        | 0.280                    | 0.071                    | 0.488       |
| Heart rate       | Control group          | 56.75±5.56 <sup>a</sup>  | 73.50±12.79 <sup>a</sup> | 16.75±13.25 |
|                  | AFB <sub>1</sub> group | 67.25±11.30 <sup>a</sup> | 57.50±8.70 <sup>a</sup>  | -9.75±11.45 |
|                  | <i>P</i> -value        | 0.146                    | 0.084                    | 0.022       |

Note: Mean values with same superscripts in a row have no significant ( $P > 0.05$ ), compared pro-test to post-test ( $n = 6/\text{group}$ ); D-value: The differences between post-intervention and pre-intervention.

**Table S3.** Effects of AFB1 exposure on serum biochemistry of sheep.

| Item          | Control group           | AFB1 group              | P-value |
|---------------|-------------------------|-------------------------|---------|
| TP (g/L)      | 69.03±5.87              | 63.17±9.10              | 0.214   |
| ALB (g/L)     | 24.72±2.88              | 21.18±3.66              | 0.093   |
| GLO (g/L)     | 44.30±4.53              | 41.97±7.07              | 0.512   |
| A/G           | 0.56±0.08               | 0.51±0.01               | 0.397   |
| TBIL (umol/L) | 1.6±0.3 <sup>a</sup>    | 2.85±0.47 <sup>b</sup>  | 0.002   |
| AST (U/L)     | 126.83±22.38            | 152±37.67               | 0.190   |
| ALT (U/L)     | 14.83±10.80             | 20.33±6.28              | 0.582   |
| AMY (U/L)     | 15.83±10.21             | 12.75±10.90             | 0.660   |
| TG (mmol/L)   | 0.44±0.15               | 1.32±1.47               | 0.470   |
| CRE (umol/L)  | 57.20±7.36              | 63.20±11.45             | 0.306   |
| BUN (mmol/L)  | 8.37±2.78               | 9.57±4.64               | 0.599   |
| BUN/CRE       | 149.97±55.98            | 152.77±65.03            | 0.938   |
| Ca (mmol/L)   | 2.10±0.063 <sup>a</sup> | 1.96±0.083 <sup>b</sup> | 0.006   |
| P (mmol/L)    | 2.56±0.31               | 2.14±0.52               | 0.119   |
| GLU (mmol/L)  | 4.67±3.18               | 3.30±2.05               | 0.513   |
| CK (U/L)      | 262±262.46              | 512.83±648.79           | 0.411   |

Note: <sup>a,b</sup>Mean values with different superscripts in a row differ significantly ( $P < 0.05$ ,  $n = 6/\text{group}$ ).

### Conjunctival color

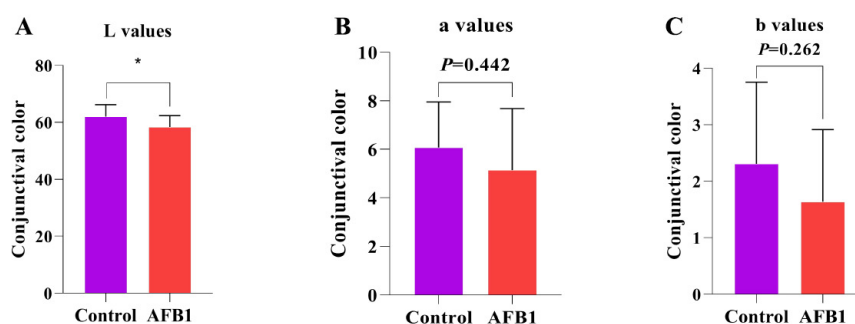

**Figure S1.** Effects of AFB1 exposure on conjunctival color. (A–C) Conjunctival color [lightness (L values), redness (a values), yellowness (b values)]. Data represent means±s.d., Student's t-test. Statistics were considered significant at  $P < 0.05$ . \*  $P < 0.05$ .
